# Supplementary material for: Wolbachia strains wMel and wAlbB differentially affect Aedes aegypti traits related to fecundity
Source: PubMed Central journal article supplement (PMC10986601; doi:10.1128/spectrum.00128-24), 2024-03-14

**Supplementary Figure 1:** Principal component analysis of the dataset variation. The first two axes explained 56.4% of total variation. Each point corresponds to an adult *Ae. aegypti* female, colored according to mosquito strain: green = *Wolbachia*-uninfected; red = wAlbB; blue = wMel.

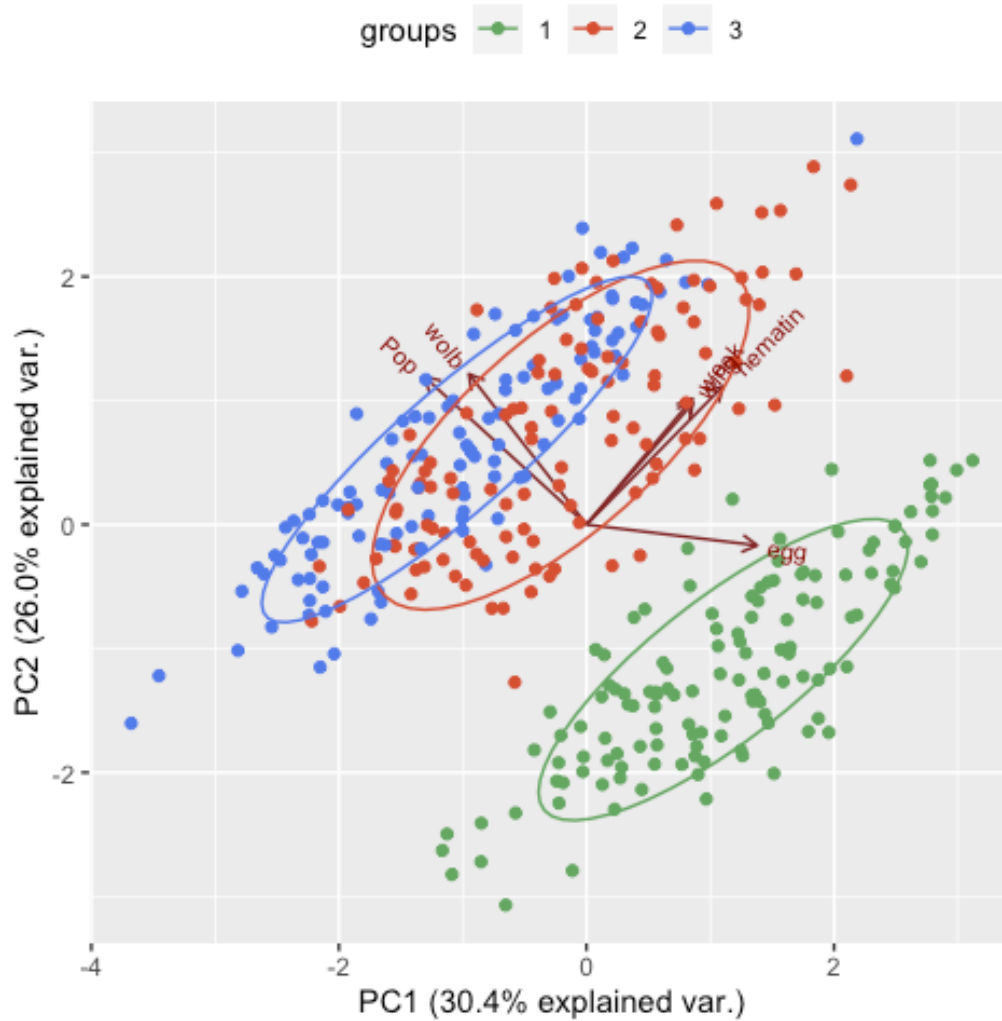

**Supplementary Figure 2:** Full model path diagrams for: (A) *Wolbachia*-uninfected field population, (B) *wMel*, and (C) *wAlbB*. Numbers over the arrows are the path coefficients and their statistical significance is indicated as follows: \*  $P < 0.05$ , \*\*  $P < 0.01$ .

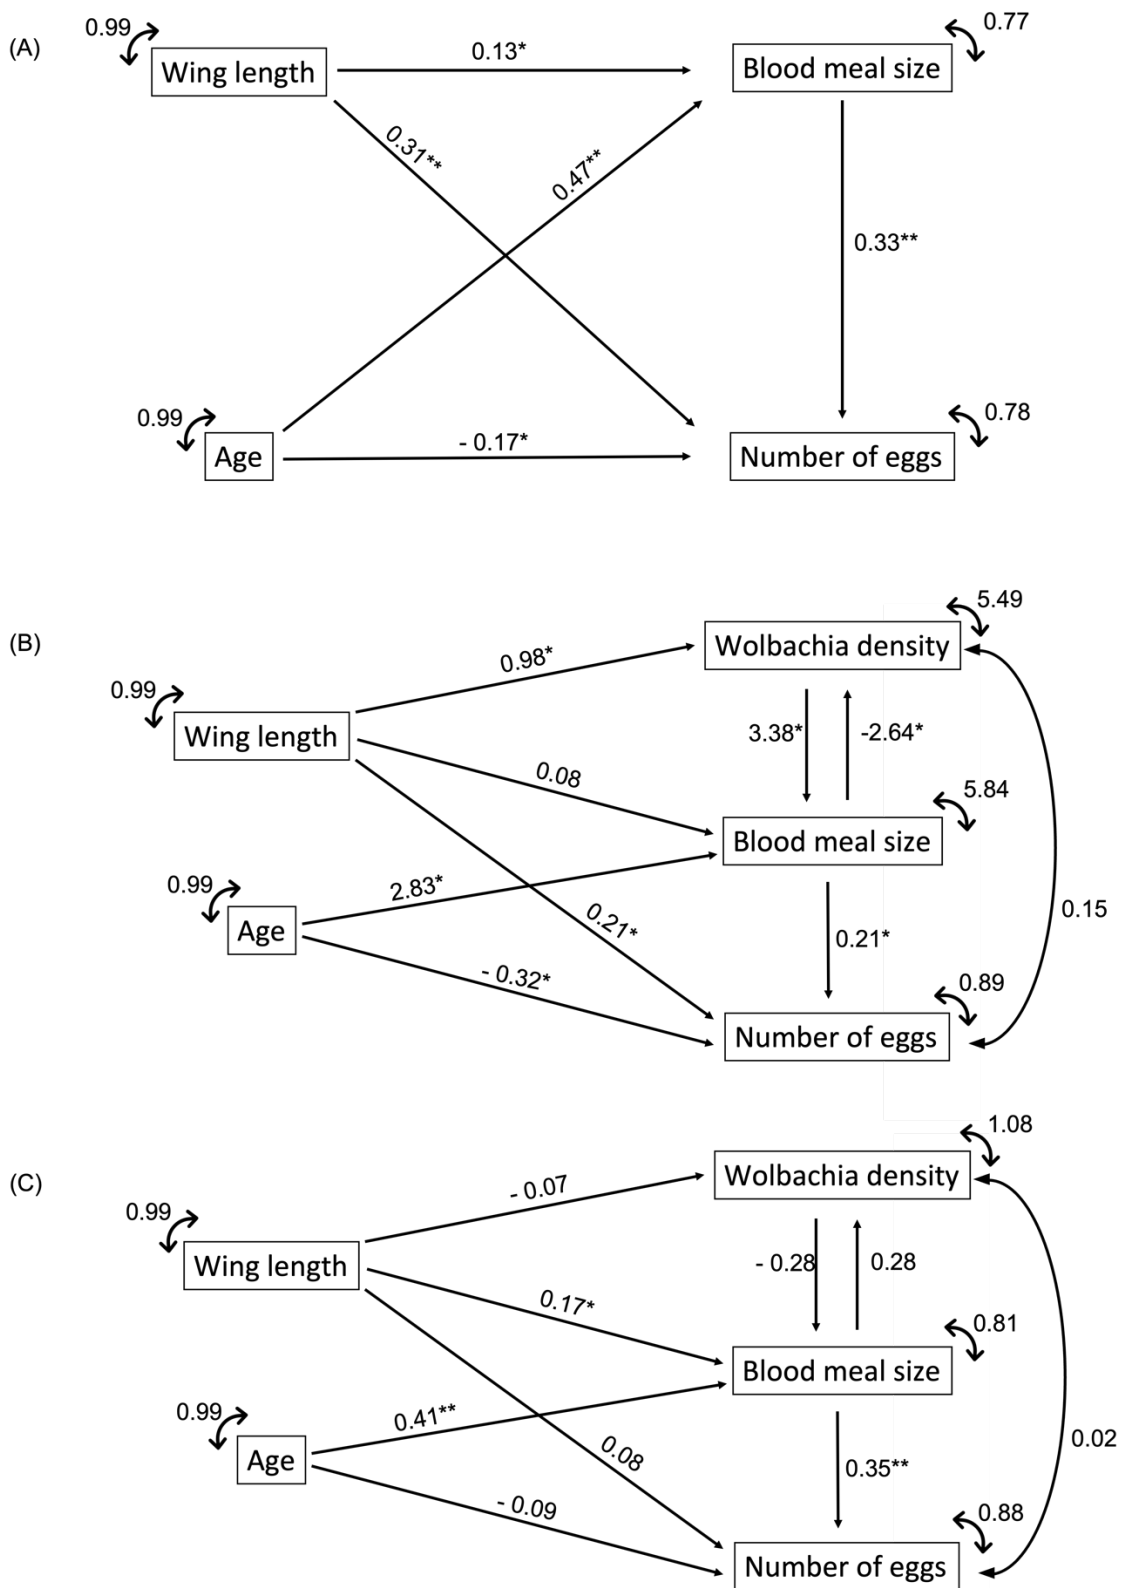

Supplement: spectrum.00128-24-s0001.pdf [file spectrum.00128-24-s0001.pdf]
